# Supplementary material for: Preclinical Evaluation of [155/161Tb]Tb-Crown-TATE—A Novel SPECT Imaging Theranostic Agent Targeting Neuroendocrine Tumours
Source: MDPI journal article supplement (doi:10.3390/molecules28073155), 2023-04-01
Supplement: s1 [file s1]

Supporting Information for:

# Preclinical Evaluation of [<sup>155/161</sup>Tb]Tb-Crown-TATE — A Novel SPECT Imaging Theranostic Agent Targeting Neuroendocrine Tumours

Luke Wharton <sup>1</sup>, Scott W. McNeil <sup>1</sup>, Helen Merkens <sup>2</sup>, Zheliang Yuan <sup>1</sup>, Michiel Van de Voorde <sup>3</sup>,  
Gokce Engudar <sup>1</sup>, Aidan Ingham <sup>1</sup>, Helena Koniar <sup>1,4</sup>, Cristina Rodríguez-Rodríguez <sup>4,5</sup>,  
Valery Radchenko <sup>1,6</sup>, Maarten Ooms <sup>3</sup>, Peter Kunz <sup>7,8</sup>, François Bénard <sup>2,9</sup>, Paul Schaffer <sup>1,8,9</sup>  
and Hua Yang <sup>1,8,\*</sup>

<sup>1</sup> Life Sciences Division, TRIUMF, 4004 Wesbrook Mall, Vancouver, BC V6T 2A3, Canada;  
lwharton@triumf.ca (L.W.)

<sup>2</sup> Department of Molecular Oncology, BC Cancer Research Institute,  
Vancouver, BC V5Z 1L3, Canada;

<sup>3</sup> Nuclear Medicine Applications, Belgium Nuclear Research Center (SCK CEN), Boeretang,  
200, 2400 Mol, Belgium

<sup>4</sup> Department of Physics and Astronomy, University of British Columbia, 6224 Agronomy  
Road, Vancouver, BC V6T 1Z1, Canada

<sup>5</sup> Faculty of Pharmaceutical Sciences, University of British Columbia, 2405 Wesbrook Mall,  
Vancouver, BC V6T 1Z3, Canada

<sup>6</sup> Department of Chemistry, University of British Columbia, 2036 Main Mall,  
Vancouver, BC V6T 1Z1, Canada

<sup>7</sup> Accelerator Division, TRIUMF, 4004 Wesbrook Mall, Vancouver, BC V6T 2A3, Canada

<sup>8</sup> Department of Chemistry, Simon Fraser University, Burnaby, BC V5A 1S6, Canada

<sup>9</sup> Department of Radiology, University of British Columbia, Vancouver, BC V5Z 1M9, Canada

\* Correspondence: hyang@triumf.ca

## Table of Contents

|                                      |   |
|--------------------------------------|---|
| Synthesis and Characterisation ..... | 3 |
| Radiochemistry Studies.....          | 4 |
| Radio-TLCs .....                     | 4 |
| Preclinical Studies .....            | 5 |
| SPECT Biodistribution Studies.....   | 5 |
| Full Biodistribution Studies.....    | 6 |

## Synthesis and Characterisation

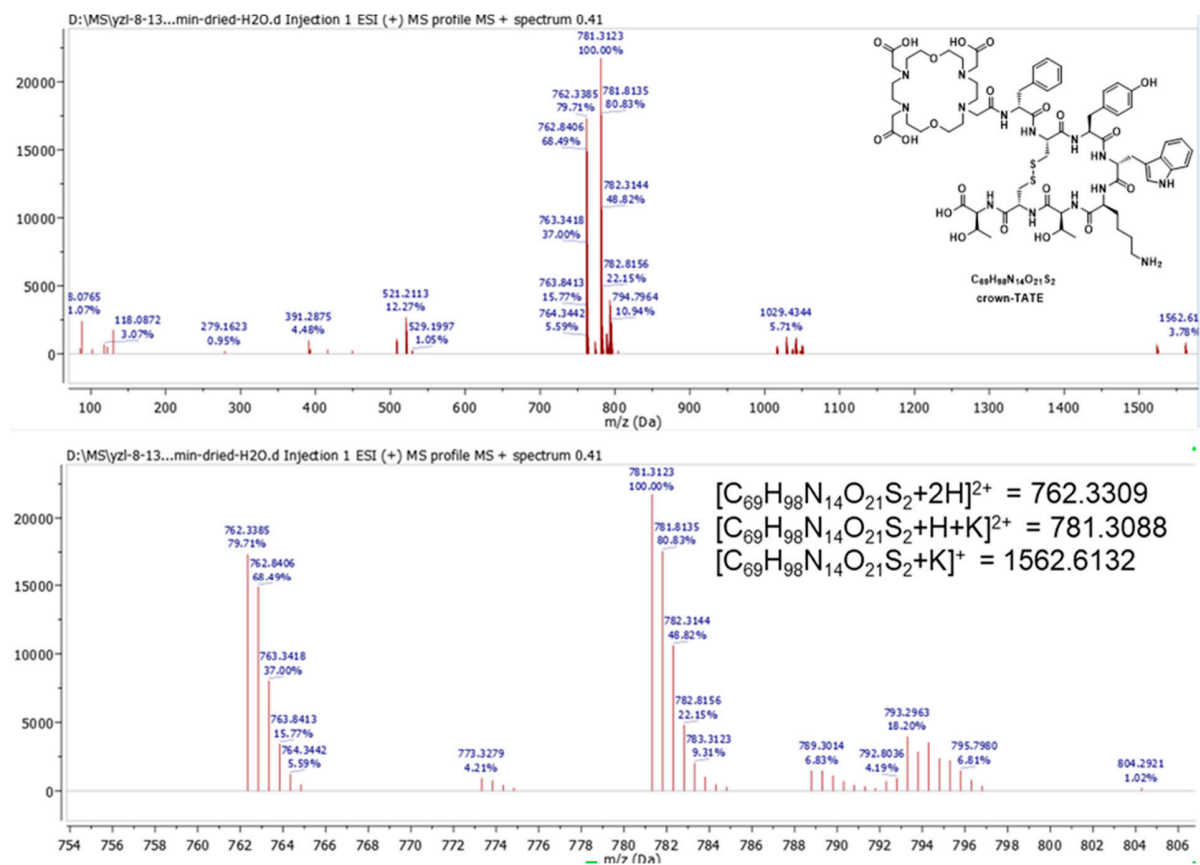

Figure S1. High-resolution electrospray ionisation mass spectrometry characterisation of crown-TATE.

## Radiochemistry Studies

### Radio-TLCs

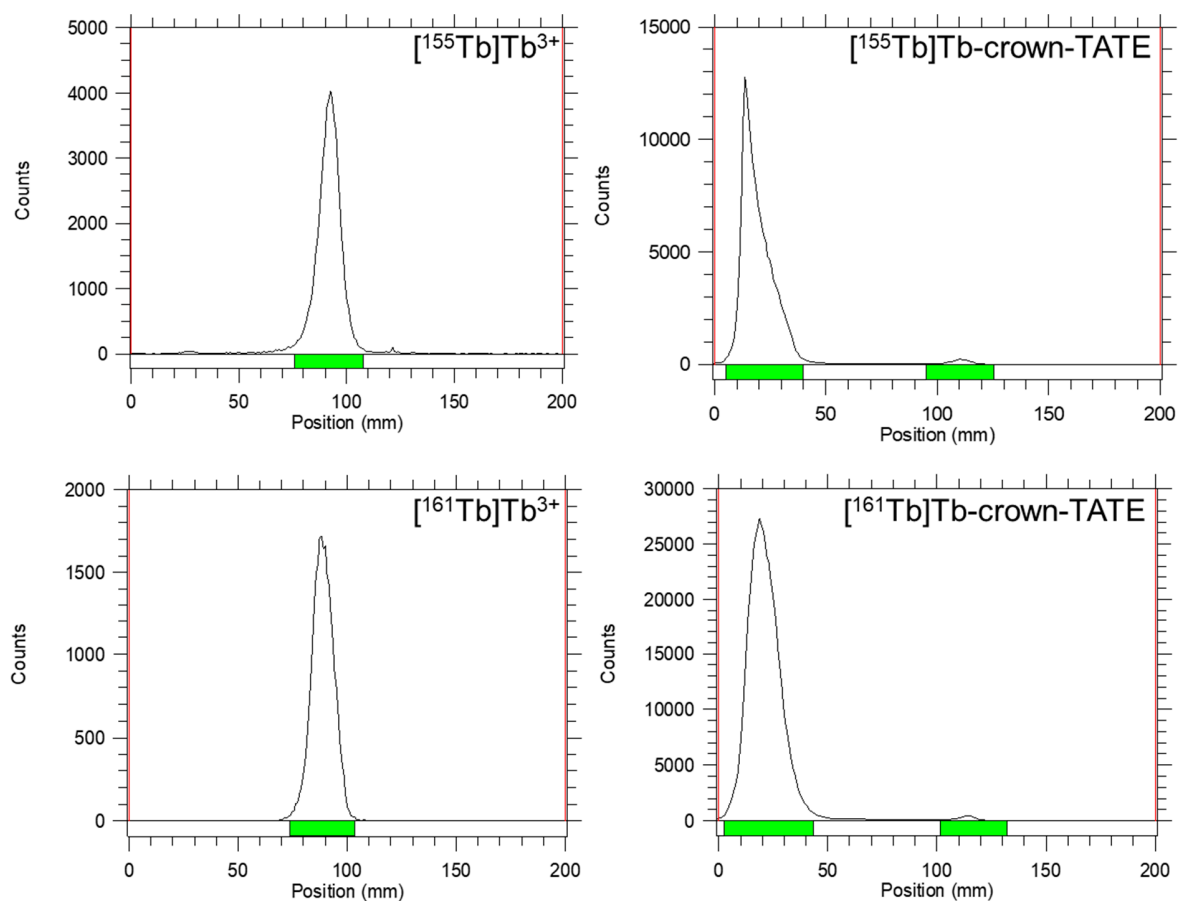

**Figure S2.** Representative radio-TLC traces for  $^{155}\text{Tb}$  and  $^{161}\text{Tb}$  – labelled crown-TATE and negative control reactions. Measured using SG-paper iTLC plates with EDTA (50 mM, pH 5.5) as eluent.

## Preclinical Studies

### SPECT Biodistribution Studies

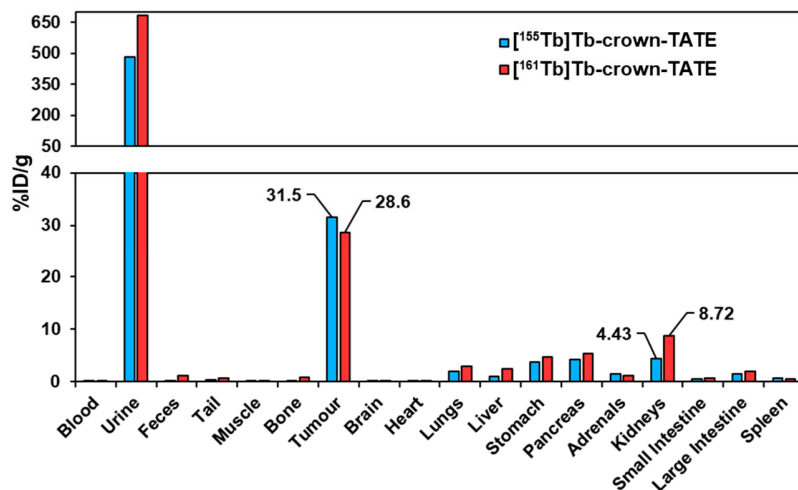

**Figure S3.** Biodistribution results for imaging mice bearing AR42J tumour xenografts at 2.5 h post-administration of  $[^{155}\text{Tb}]$ Tb-crown-TATE (13.8 MBq, 0.71 nmol) and  $[^{161}\text{Tb}]$ Tb-crown-TATE (7.95 MBq, 0.70 nmol).

**Table S1.** Biodistribution results for imaging mice bearing AR42J tumours xenografts at 2.5 h post administration of  $[^{155}\text{Tb}]$ Tb-crown-TATE (13.8 MBq, 0.71 nmol) and  $[^{161}\text{Tb}]$ Tb-crown-TATE (7.95 MBq, 0.70 nmol).

| Organ            | $[^{155}\text{Tb}]$ Tb-crown-TATE | $[^{161}\text{Tb}]$ Tb-crown-TATE |
|------------------|-----------------------------------|-----------------------------------|
|                  | %ID/g                             | %ID/g                             |
| Blood            | 0.07                              | 0.21                              |
| Urine            | 482.5                             | 683.1                             |
| Feces            | 0.22                              | 1.23                              |
| Tail             | 0.32                              | 0.68                              |
| Muscle           | 0.02                              | 0.04                              |
| Bone             | 0.28                              | 0.83                              |
| Tumour           | 31.51                             | 28.58                             |
| Brain            | 0.02                              | 0.02                              |
| Heart            | 0.10                              | 0.21                              |
| Lungs            | 1.97                              | 2.91                              |
| Liver            | 0.98                              | 2.39                              |
| Stomach          | 3.74                              | 4.78                              |
| Pancreas         | 4.31                              | 5.39                              |
| Adrenals         | 1.42                              | 1.22                              |
| Kidneys          | 4.43                              | 8.72                              |
| Small Intestine  | 0.50                              | 0.75                              |
| Large Intestine  | 1.43                              | 1.99                              |
| Spleen           | 0.70                              | 0.44                              |
| Tumour-to-Blood  | 465                               | 134                               |
| Tumour-to-Muscle | 1534                              | 650                               |
| Tumour-to-Bone   | 114                               | 34.3                              |
| Tumour-to-Kidney | 7.12                              | 3.28                              |

## Full Biodistribution Studies

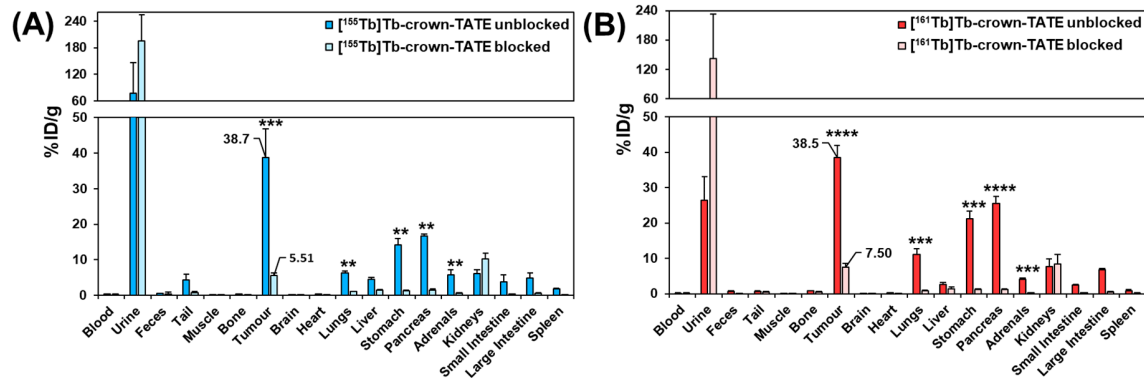

**Figure S4.** Biodistribution results in male NRG mice bearing AR42J tumour xenografts at 2 h p.i. of: (A) [ $^{155}\text{Tb}$ ]Tb-crown-TATE (~175 kBq, 93 pmol/animal) (n=4) (unblocked) and [ $^{155}\text{Tb}$ ]Tb-crown-TATE (~175 kBq, 93 pmol/animal) (blocked with DOTATOC (23 nmol/animal)) (n=3); (B) [ $^{161}\text{Tb}$ ]Tb-crown-TATE (~850 kBq, 76 pmol/animal) (unblocked) (n=4) and [ $^{161}\text{Tb}$ ]Tb-crown-TATE (~850 kBq, 76 pmol) (blocked with DOTATOC (23 nmol/animal)) (n=3). (\*\* =  $p < 0.01$ , \*\*\* =  $p < 0.001$ , \*\*\*\* =  $p < 0.0001$ ).

**Table S2.** Full biodistribution results for [ $^{155}\text{Tb}$ ]Tb-crown-TATE (~175 kBq, 93 pmol/animal) (n=4) (unblocked); [ $^{155}\text{Tb}$ ]Tb-crown-TATE (~175 kBq, 93 pmol/animal) (blocked with DOTATOC (23 nmol/animal)) (n=3); [ $^{161}\text{Tb}$ ]Tb-crown-TATE (~850 kBq, 76 pmol/animal) (unblocked) (n=4); and [ $^{161}\text{Tb}$ ]Tb-crown-TATE (~850 kBq, 76 pmol) (blocked with DOTATOC (23 nmol/animal)) (n=3) in male NRG mice bearing AR42J tumour xenografts at 2 h p.i.

| Organ            | [ $^{155}\text{Tb}$ ]Tb-crown-TATE blocked |       | [ $^{155}\text{Tb}$ ]Tb-crown-TATE unblocked |       | [ $^{161}\text{Tb}$ ]Tb-crown-TATE blocked |       | [ $^{161}\text{Tb}$ ]Tb-crown-TATE unblocked |       |
|------------------|--------------------------------------------|-------|----------------------------------------------|-------|--------------------------------------------|-------|----------------------------------------------|-------|
|                  | %ID/g                                      | Error | %ID/g                                        | Error | %ID/g                                      | Error | %ID/g                                        | Error |
| Blood            | 0.25                                       | 0.08  | 0.28                                         | 0.15  | 0.14                                       | 0.07  | 0.17                                         | 0.02  |
| Urine            | 196                                        | 58.0  | 78.0                                         | 68.5  | 142                                        | 91.1  | 26.5                                         | 6.5   |
| Feces            | 0.41                                       | 0.55  | 0.54                                         | 0.02  | 0.09                                       | 0.03  | 0.63                                         | 0.13  |
| Tail             | 0.72                                       | 0.31  | 4.31                                         | 1.54  | 0.46                                       | 0.14  | 0.70                                         | 0.09  |
| Muscle           | 0.04                                       | 0.01  | 0.08                                         | 0.03  | 0.03                                       | 0.01  | 0.04                                         | 0.01  |
| Bone             | 0.13                                       | 0.03  | 0.34                                         | 0.06  | 0.47                                       | 0.10  | 0.73                                         | 0.09  |
| Tumour           | 5.51                                       | 0.73  | 38.7                                         | 8.02  | 7.50                                       | 1.08  | 38.5                                         | 3.45  |
| Brain            | 0.02                                       | 0.01  | 0.04                                         | 0.01  | 0.01                                       | 0.00  | 0.02                                         | 0.00  |
| Heart            | 0.13                                       | 0.02  | 0.32                                         | 0.07  | 0.12                                       | 0.04  | 0.24                                         | 0.02  |
| Lungs            | 1.13                                       | 0.03  | 6.27                                         | 0.59  | 0.89                                       | 0.14  | 11.1                                         | 1.62  |
| Liver            | 1.40                                       | 0.29  | 4.48                                         | 0.49  | 1.43                                       | 0.42  | 2.63                                         | 0.59  |
| Stomach          | 1.31                                       | 0.17  | 14.2                                         | 1.88  | 1.23                                       | 0.18  | 21.2                                         | 2.12  |
| Pancreas         | 1.50                                       | 0.26  | 19.7                                         | 4.30  | 1.20                                       | 0.21  | 25.5                                         | 1.96  |
| Adrenals         | 0.53                                       | 0.18  | 5.79                                         | 1.41  | 0.21                                       | 0.05  | 4.04                                         | 0.44  |
| Kidneys          | 10.2                                       | 1.65  | 6.13                                         | 0.99  | 8.44                                       | 2.68  | 7.71                                         | 2.11  |
| Small Intestine  | 0.38                                       | 0.04  | 3.85                                         | 1.84  | 0.24                                       | 0.09  | 2.43                                         | 0.23  |
| Large Intestine  | 0.60                                       | 0.06  | 4.84                                         | 1.42  | 0.48                                       | 0.08  | 6.75                                         | 0.40  |
| Spleen           | 0.19                                       | 0.06  | 1.73                                         | 0.33  | 0.16                                       | 0.08  | 0.86                                         | 0.29  |
| Tumour-to-Blood  | 21.8                                       | -     | 139                                          | -     | 52.9                                       | -     | 226                                          | -     |
| Tumour-to-Muscle | 136                                        | -     | 488                                          | -     | 236                                        | -     | 1021                                         | -     |
| Tumour-to-Bone   | 42.2                                       | -     | 113                                          | -     | 16.0                                       | -     | 52.4                                         | -     |
| Tumour-to-Kidney | 0.54                                       | -     | 6.32                                         | -     | 0.89                                       | -     | 4.99                                         | -     |
